# Supplementary material
Source: Springer Nature journal article supplement (https://www.springermedizin.de/resource/supplementary/12889_2008_1370_MOESM4_ESM.pdf/9503058)

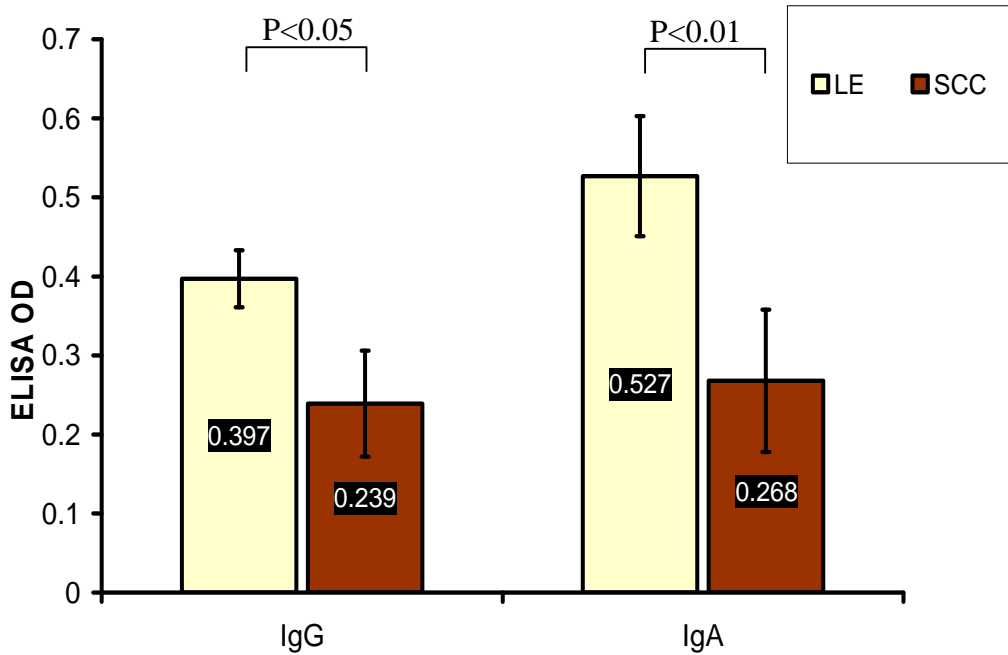

Supplement: MOESM4 [file 9503058]
